# Supplementary material for: Role in Diuresis of a Calcitonin Receptor (GPRCAL1) Expressed in a Distal-Proximal Gradient in Renal Organs of the Mosquito Aedes aegypti (L.)
Source: PubMed Central journal article supplement (PMC3510207; doi:10.1371/journal.pone.0050374), 2012-11-29
Supplement: pone.0050374.s001.pdf [file pone.0050374.s001.pdf]

|                                                                           |      |
|---------------------------------------------------------------------------|------|
| CGAACCAATTCCTACACCGCAACGCAAGTGTCTTCATTTCGTAGCGGTCCGCCTATTCCCGGC           | 1224 |
| R <b>T</b> N <b>S</b> Y T A <b>T</b> Q V <b>S</b> F I R S G P P I P G     | 408  |
| GAAGAGAAGGTCT <b>TGA</b> CTAAAAGAGTACGCCAGCGGCAATAGGTCTCCCCAGCCAACGAGCTTG | 1287 |
| E E K V *                                                                 | 412  |
| AACCCCGTTAACGATCGGAGTTTTTCGGGAAATCCAACGACACCAACGGGTTTGGGAAGGTAAG          | 1350 |
| AGCAACGGTAATGGACCGGACTTATCGGTAGACGTGTCGAAAGATGACGCAATCTTTGGAGAC           | 1413 |
| GCCAAAGCAAAGATCAATGGAGCTTCCGCCCATATCGAAGAACGGCTCGGCACATGGCGGAGA           | 1476 |
| GGTTCAATTGAGTGTAGACATGTGAAGTTACCTCTTCTGGAAGCGCAACACAGGGAAAACGAT           | 1539 |
| GGGGATCGTGAGGGGAGAGGCTGAACAAGCTTCGCAACTTTTCGTTGAGCCGGCTCCGGCAGAT          | 1602 |
| GAAGTGTGTGAACCTCTCGTTAGAACACAAATGTATCGAATTAATGATAGGTGAATTTATTAG           | 1665 |
| CTTAAGGTTCAAAGAATTTCGAATATGTACAATGATGTAGTCATTCTAAGCTTAGTCTTACTA           | 1728 |
| TTGTGACCGGTGGAAACCCACTTAACTACGCGTAGTTTTTATTTTAAACGTTCTTAAACGCTTC          | 1791 |
| AATTTTTTTGTAGCAAATACACAAACACACTCCACCTGTTAAGGGATAAATGTGATCATGGTG           | 1854 |
| CAAAATAAACTATCTGATTTCGTGAAAAAAAAAAAAAAAAAAAAAAAAAAAA                      | 1901 |

**Figure S1. *AeegGPRcall* full length cDNA cloned from MTs, and deduced amino acid sequence.**

The cDNA sequence is 1995 bp, encoding a 412 amino acid residue protein. Seven transmembrane regions are predicted by TMHMM and underlined (●—●). The highly conserved six cysteine (C21, C40, C49, C63, C80, C102), two tryptophan (W50, W86), two proline (P51, P64), and aspartic acid (D45) residues in Family B GPCRs are indicated with white letters in black circles (residues at the N terminus) [1,2]. Three predicted N-linked glycosylation sites are double-underlined. Black squares indicate prediction of potential phosphorylation sites by protein-kinase A, D, and G.

References

1. Harmar AJ (2001) Family-B G-protein-coupled receptors. *Genome Biol* 2: 3013.
2. Hoare SR (2005) Mechanisms of peptide and nonpeptide ligand binding to Class B G-protein coupled receptors. *Drug Discov Today* 10: 417-427.
