# Supplementary material for: Role in Diuresis of a Calcitonin Receptor (GPRCAL1) Expressed in a Distal-Proximal Gradient in Renal Organs of the Mosquito Aedes aegypti (L.)
Source: PubMed Central journal article supplement (PMC3510207; doi:10.1371/journal.pone.0050374), 2012-11-29
Supplement: pone.0050374.s002.pdf [file pone.0050374.s002.pdf]

AaegGPCRAL1 ..... MTSSITL 6  
 CquiGPCRAL1 ..... MSSTITL 6  
 AgamGPCRAL1 ..... MALSTITL 6  
 DmelCG32843 ..... MSDQI GNPNTATFSGSGSGGTN - VASIAES 29  
 PcorGPCRAL1 ..... 0  
 NviGPCRAL1 ..... 0  
 HsapCALCRL ..... MEKKKCTLYFVLLPFFMVTAELEESP...-EDS-IQ 33  
 RnorCALCRL ..... MMDKKCTLCFLFLLLNALIAAESEEG...-ANC-ID 33  
 GgalCALCRL ..... MTKNW TFLFFFSVTLFATAI PSEGHQNMITESS-GQ 37  
 XlaeCALCRL ..... METLQMLLSRSALFKYIIIFLI MINTRGVVASQEQEAKTS - VPEE-RQ 48  
 DrerCALCRLA ..... MTASCWTICLFLGSVTEFIVLASPEVNESQQQHPQNVYHD 41  
 PolICGRPR ..... MDV/RWTFLLLSFSDQLVASSAEAEH...-QENAKH 34  
 CgCTR MYM AVLTLTPM VSYTWADLDI YRGLCRSHLYGHENVQDFRQYSCAWCFRFFVHLKYRPLVNSTGTPVYVI FHNGGRVRFESMDFRNQSVKAVCDV 100

AaegGPCRAL1 TDAIDSEFDORKLQCLEMLNATTEFTTTRS----GPFGRGTWOGWLCMPDTAAGSALLPQDFMDGDFDRFRAKQDDEGEMFRHPLNTRWTSNYITL 101  
 CquiGPCRAL1 TEASVDVSELKRLKLEALKNESVESASDSD---QIFGRGTWOGWLCMPDTAAGRIANAPQPEVVFQDITTRFAKADDEGEMFRHPLNTRWTSNYITL 101  
 AgamGPCRAL1 TDAVDDEAKQKRLKLELNETVDTTISG---GLFGRGTWOGWLCMPDTAAGSALLPQDFMDGDFDRFRAKQDDEGEMFRHPLNTRWTSNYITL 100  
 DmelCG32843 VAESGPDFDALRAACETRLNASGQLAGSGGPGAEGTCHAGTFDGLWLCMPDTAVGTSANELCPDFITGDFDRYAKKQDDEGEMFRHPLNTRWTSNYITL 129  
 PcorGPCRAL1 ..... MPANFVLCG...LYCEGTFDGSWCMPTDPAGITANVSPGCVTGEDD...KQDSSKGSIVKQDDEGEMFRHPLNTRWTSNYITL 68  
 NviGPCRAL1 ..... MALR...DSWSVATE...PYCPAIFDGSWCMPTDPAGITANVSPGCVTGEDD...KQDSSKGSIVKQDDEGEMFRHPLNTRWTSNYITL 79  
 HsapCALCRL LGVITRNKI MTAQYCYCYCKI MDP-PIQQAE...GVYCNRTWOGWLCVNDVAAAGHESMOCQDVFQDFDPSEKVIKIQDQDGNMFRHPLNTRWTSNYITL 126  
 RnorCALCRL LGVITRNKI MTAQYCYCYCKI MDP-PIQQAE...GVYCNRTWOGWLCVNDVAAAGHESMOCQDVFQDFDPSEKVIKIQDQDGNMFRHPLNTRWTSNYITL 126  
 GgalCALCRL LGVITRNKI MTAQYCYCYCKI MDP-PIHRKE...GPYCNRTWOGWLCVSDVAAAGVSVCHQDVFQDFDPSEKVIKIQDSSGNMFRHPLNTRWTSNYITL 130  
 XlaeCALCRL VGVITONKI MTAQYCYCYCKI MDP-PAHGKE...GQF CNRTWOGWLCVSDVAAAGI I SECRQDVFQDFDPSEKVIKIQEGKNGMFRHPLNTRWTSNYITL 141  
 DrerCALCRLA IGVITRNKI MTAQYCYCYCKI MDP-NSQDRR...GPV CNRTWOGWLCVDDTEAGI TSECHQDVFQDFDPSEKVIKIQEGKNGMFRHPLNTRWTSNYITL 134  
 PolICGRPR GI HSNQI...RAQYCF...MRESHSSKAK...GLTANATWOGWLCVSRITKAGRTKCNQDVFQDFDPSEKVIKIQEGKNGMFRHPLNTRWTSNYITL 128  
 CgCTR LITSDECHQWTSCCSAERCCQRQLSVKKG...TNSSCGRVWOGWLCVDAEPGTRSRVGSQPLMPFFITSRCAFRTQOTNGEVI TR-----IDVNP 189

TM1 TM2

AaegGPCRAL1 CVN--DKLWMEQVRTI YETGYSI SLIALI LSLG LSYFRSLKCAR...ITLHMNLFASFAISNNTWLLWYRMVLAD-----PEVUKHNGASQITLH 190  
 CquiGPCRAL1 CVN--IDPFTWSROI NTI YETGYSI SLIALI LSLG LSYFRSLKCAR...ITLHMNLFASFAISNNTWLLWYRMVLAD-----PEVUSHNGSPQITLH 190  
 AgamGPCRAL1 CVN--IDDFWVRKQVNL I YETGYAI SLIALI LSLG LSYFRSLKCAR...ITLHMNLFVSAQANNSWLLWYRLVLTQ-----LDLTKESGAGQITLH 189  
 DmelCG32843 CVN--LEDLNWRHTVNL I SEVGYGSLAL ILSUA LSYFRSLKCAR...ITLHMNLFASFAANNSWLLWYLLMPPN-----SELLHQSPROVALITL 218  
 PcorGPCRAL1 CVD--QEDLSAR...TI NOI YETGYLI SLIALIASUA IYTFKSLRCSR...ITLHLLVSVFAVNNALWLLWYRFILGD-----PNVIKENGVAQRI FHV 157  
 NviGPCRAL1 CVN--LVBL SWOQCLNLYETGYVITSLVALLVSLGLTYFRSLKCAR...ITLHMNLFASFAANNSWLLWYGSVAVN-----AQQLNNGMCRFLFHV 168  
 HsapCALCRL CNVNTHEKVTALNLYLTI LGHLSI ASLLSLG FFFYKSLSCOR...ITLHKNLFFSFVNSIVITILHTAVANN-----CALVATNPVSKVVSQF 217  
 RnorCALCRL CNMSTHEKVTALNLYLTI LGHLSI ASLLSLG FFFYKSLSCOR...ITLHKNLFFSFVNSIVITILHTAVANN-----CALVATNPVSKVVSQF 217  
 GgalCALCRL CNI YTHEKVTALNLYLTI LGHLSI TSLLSLG FFFYKSLSCOR...ITLHKNLFFSFVNSIVITILHTAVANN-----CKLVATNPVSKVAMF 221  
 XlaeCALCRL CNTFTHEKVTALNLYLTI LGHLSI ASLLSLG FFFYKSLSCOR...ITLHKNLFFSFVNSIVITILHTAVANN-----CALVATNPVSKVVSQF 232  
 DrerCALCRLA CNLHTTGRRTAMNLYLTI LGHLSI TSLLSLG FFFYKSLSCOR...ITLHKNLFFSFVNSIVITILHTAVANN-----CBVQONPVSKVVSQF 225  
 PolICGRPR CORNTTHNEMVAMSHFVLMGQGLSLVSLLSLG FFFYKSLSCOR...ITLHKNLFFSFVNSIVITLVMNNTLKDCK-----PGHNNDSVSKLVI 219  
 CgCTR CIK-----KLELETTLFI GLGCSI ASLVALVPALELKYRSLRCHRRLHNLSELLKEVMDILVMDLTYDKVSTTTFVETTMONGVQGLSSE 284

TM3 TM4 TM5

AaegGPCRAL1 VLHYFLI TNYAMMLCEGFYLHTLVLSAFVSEKKLVNVLVGLWTTGPIVIMAYGFLRCYAGTPEDTI ECWMN--ESVYDNVFKA PVGIM SMLNLLVFCNII 289  
 CquiGPCRAL1 VLHYFLI TNYAMMLCEGFYLHTLVLSAFVSEKKLVNVLVGLWTTGPIVIMAYGFLRCYAGTPEDTI ECWMN--ESVYDNVFKA PVGIM SMLNLLVFCNII 289  
 AgamGPCRAL1 VLHYFLI TNYAMMLCEGFYLHTLVLSAFVSEKKLVNVLVGLWTTGPIVIMAYGFLRCYAGTPEDTI ECWMN--DSFNKVFVPGVIM SMLNLLVFCNII 288  
 DmelCG32843 VLHYFLI TNYAMMLCEGFYLHTLVLSAFVSEKKLVNVLVGLWTTGPIVIMAYGFLRCYAGTPEDTI ECWMN--CTNYQNLVMPVGI SMLNLLVFCNII 317  
 PcorGPCRAL1 VLHYFLI TNYAMMLCEGFYLHTLVLSAFVSEKKLVNVLVGLWTTGPIVIMAYGFLRCYAGTPEDTI ECWMN--ETKYTNVNLVVPVIM SMLNLLVFCNII 255  
 NviGPCRAL1 VLHYFLI TNYAMMLCEGFYLHTLVLSAFVSEKKLVNVLVGLWTTGPIVIMAYGFLRCYAGTPEDTI ECWMN--BGNMVMVLLI YPVVCSITLNLVFCNII 267  
 HsapCALCRL LHLYL MGNFYFWM LCEG IYHTLVLSAFVSEKKLVNVLVGLWTTGPIVIMAYGFLRCYAGTPEDTI ECWMN--NDNCWSSDTHLHYI HGPI CAALLVNLFFLLNVL 313  
 RnorCALCRL LHLYL MGNFYFWM LCEG IYHTLVLSAFVSEKKLVNVLVGLWTTGPIVIMAYGFLRCYAGTPEDTI ECWMN--NDNCWSSDTHLHYI HGPI CAALLVNLFFLLNVL 313  
 GgalCALCRL LYQYL MGNFYFWM LCEG IYHTLVLSAFVSEKKLVNVLVGLWTTGPIVIMAYGFLRCYAGTPEDTI ECWMN--NDNCWSSDTHLHYI HGPI CAALLVNLFFLLNVL 317  
 XlaeCALCRL LHLYL MGNFYFWM LCEG IYHTLVLSAFVSEKKLVNVLVGLWTTGPIVIMAYGFLRCYAGTPEDTI ECWMN--NDNCWSSDTHLHYI HGPI CAALLVNLFFLLNVL 328  
 DrerCALCRLA LHLYL MGNFYFWM LCEG IYHTLVLSAFVSEKKLVNVLVGLWTTGPIVIMAYGFLRCYAGTPEDTI ECWMN--NDNCWSSDTHLHYI HGPI CAALLVNLFFLLNVL 321  
 PolICGRPR LHYL MGNFYFWM LCEG IYHTLVLSAFVSEKKLVNVLVGLWTTGPIVIMAYGFLRCYAGTPEDTI ECWMN--NDNCWSSDTHLHYI HGPI CAALLVNLFFLLNVL 314  
 CgCTR LKI YKRCQTYTVMFCGFYLRMSNAHSP- RSLKVMYFVWAAAPLSSSTLYGI LRGVNLN--NESCAWTSPTSLHYI HGPI CAALLVNLFFLLNVL 379

TM6 TM7

AaegGPCRAL1 RVVLLKLRAPAGPQG-TGPSRTI LCAFRATLLVPLLIGQYI LTPFRDPGHPYERTYELISAFTASFOGLFVAVLFOFFNGEV----- 372  
 CquiGPCRAL1 RVVLLKMRAPAGPQG-SGPSRTI LCAFRATLLVPLLIGQYI LTPFRDPGHPYERTYELISAFTASFOGLFVAVLFOFFNGEV----- 372  
 AgamGPCRAL1 RVVLLKLRAPAGPQG-AGPSRTI LCAFRATLLVPLLIGQYI LTPFRDPGHPYERTYELISAFTASFOGLFVAVLFOFFNGEV----- 371  
 DmelCG32843 RVVLLKLRAPASI QSGGPSRTI LCAFRATLLVPLLIGQYI LTPFRDPGHPYERTYELISAFTASFOGLFVAVLFOFFNGEV----- 401  
 PcorGPCRAL1 RVVMTLKRAGPHVCS-QRPSRTI LCAFRATLLVPLLIGQYI LTPFRDPGHPYERTYELISAFTASFOGLFVAVLFOFFNGEV----- 354  
 NviGPCRAL1 RVVMTLKRAGPAIS-Q-PSRSRTI LCAFRATLLVPLLIGQYI LTPFRDPGHPYERTYELISAFTASFOGLFVAVLFOFFNGEV----- 349  
 HsapCALCRL RVVITKLRVTHQAES-----NLYMKAVRATLLVPLLIGQYI LTPFRDPGHPYERTYELISAFTASFOGLFVAVLFOFFNGEV----- 396  
 RnorCALCRL RVVITKLRVTHQAES-----NLYMKAVRATLLVPLLIGQYI LTPFRDPGHPYERTYELISAFTASFOGLFVAVLFOFFNGEV----- 396  
 GgalCALCRL RVVITKLRVTHQAES-----NLYMKAVRATLLVPLLIGQYI LTPFRDPGHPYERTYELISAFTASFOGLFVAVLFOFFNGEV----- 400  
 XlaeCALCRL RVVITKLRVTHQAES-----NLYMKAVRATLLVPLLIGQYI LTPFRDPGHPYERTYELISAFTASFOGLFVAVLFOFFNGEV----- 411  
 DrerCALCRLA RVVITKLRVTHQAES-----SLYMKAVRATLLVPLLIGQYI LTPFRDPGHPYERTYELISAFTASFOGLFVAVLFOFFNGEV----- 404  
 PolICGRPR RVVITKLRVTHQAES-----SLYMKAVRATLLVPLLIGQYI LTPFRDPGHPYERTYELISAFTASFOGLFVAVLFOFFNGEV----- 397  
 CgCTR RI LLLQMQTHNEPQG-----NFRRAVKAFTLILPLFGHRRFFTLRYRPI SQEGHEYEKVSITISEHOGFLVSMFCFLNGEVI SNI KR----- 463

AaegGPCRAL1 --IAQVKKWR-TVFL--RITRNSYTAQVSEI RSE--P----PI PGEKVK 412  
 CquiGPCRAL1 --IAQVKKWR-TVFL--RITRNSYTAQVSVK-----F----LI KDARRO 410  
 AgamGPCRAL1 --IAQVKKWR-TVFL--RITRNSYTAQVSVST-----LTVLRV 406  
 DmelCG32843 --IAQVKKWR-MMCFNRPRTNSYTAQVSEVRCG--P----PI PGEKVK 443  
 PcorGPCRAL1 AVISQIKRKYQ-FAI F--RNRANSCTATVSRFRST--P----PIMAGEKVK 396  
 NviGPCRAL1 --IAQVKKWEGTAAFA--RKRANSCTATVSRFRST--AG--PIMAGEKVK 391  
 HsapCALCRL RNNVQYKI QFENGSSNSSEALRSASVITVSTI SDGPEY--SHDCPS EHLNKGSI HDI ENVLLKPENLYN 461  
 RnorCALCRL RNNVQYKI QFENGSSNSSDALRSASVITVSTI SDVQCY--SHDCPT EHLNKGSI HDI ENVALKPEKMYDLVM 464  
 GgalCALCRL RHNWQYKI QFESHSSSDAMRTVSVITVSTI SDGPEYNNHDOCTS EHLNKGYHDMT 457  
 XlaeCALCRL RHNWQYKI QFESAHSEGRSASVITVSSI SEI QCTTYTHOY-SEHSGNKNCHDMENVFFKTEKQYM 476  
 DrerCALCRLA RHNWQYRI QFESTITSDALRSASVITVASSI TEVQCC-YSDGHT EHLNKNYHFDNAI I KPNPFA 470  
 PolICGRPR RHWQORNI QFESTITANADFFRSASVITVASSI TEVHRC-YSEHTEHLNKSQYSPDFR----SDSPFV 459  
 CgCTR SI RHGRSLSLSTSKRNLQTDQQTLSI RSEYDVGNKEDQYKSLI VPTGKDEMLKEKSTNGSLLNHNGPHGET 536

**Figure S2. Amino acid sequence alignment of calcitonin receptor-like receptors.** *Aaeg*GPRCAL1 was aligned with those of other arthropods, a mollusk, and vertebrates. The *A. aegypti* GPRCAL1(AEU12191)<sup>1</sup> sequence is 79% identical to *C. quinquefasciatus* GPRCAL1 (CPIJ014419-PA)<sup>2</sup>, 75% identical to *A. gambiae* GPRCAL1 (AGAP009770-PA)<sup>3</sup>, 64% to sequenced *D. melanogaster* GPRCAL1 (AAN16138)<sup>4</sup>, 55% to *P. humanus corporis* GPRCAL1 (PHUM428070-PA)<sup>5</sup>, 59% to *Nasonia vitripennis* GPRCAL1 (XP\_001601649)<sup>6</sup>, 33% to human CALCLR (NP\_005786)<sup>7</sup>, 33% to rat *R. norvegicus* CALCRL (NP\_036849)<sup>8</sup>, 32% to chicken *G. gallus* CALCRL (NP\_001157122)<sup>9</sup>, 32% to frog *X. laevis* CALCRL (NP\_001080206)<sup>10</sup>, 34% to *D. rerio* CALCRLA (NP\_001004010)<sup>11</sup>, 31% to *P. olivaceus* CGRPR (BAA92817)<sup>12</sup> and 27% to *C. gigas* CTR (CAD82836)<sup>13</sup>. Accession numbers in parenthesis are of putative (2-3 and 5-6) or cloned translated sequences (1, 4 and 7-13) from GenBank or VectorBase. Predicted transmembrane domains (TM) of *Aaeg*GPRCAL1 are indicated by a line above the sequences. Blastp analysis of the *Anopheles* genome with the *Aedes* receptor sequence identified the prediction of the *AgamGPRcal1* ORF, permitting the localization of intron-exon boundaries in the genome by eye gazing because the gene organization is also conserved in *Anopheles*. **Conserved residues between *Aaeg*GPRCAL1 and hCALCRL:** Residues in *Aaeg*GPRCAL1 with demonstrated functional significance in hCALCRL are as follows: receptor coupling with Gs (R146), receptor cell-surface expression (Y209, L210, H211, E371, and V372) [1,2], structural stabilization (P236, P273, P323 and P333) [3], GPCR kinases phosphorylation (S391, S398, T382, T387, T389 and T395) [4]. In hCALCRL, aspartate (D69) in the N-terminus and leucine (L351) in TM6 are important residues associated with RAMP1; these corresponding residues are conserved in *Aaeg*GPRCAL1 (D45 and L331) and *Dmel*GPRCAL1 (D73 and L360) [5,6].

## References

1. Conner AC, Simms J, Conner MT, Wootten DL, Wheatley M, et al. (2006) Diverse functional motifs within the three intracellular loops of the CGRP1 receptor. *Biochemistry* 45: 12976-12985.
2. Conner M, Hicks MR, Dafforn T, Knowles TJ, Ludwig C, et al. (2008) Functional and biophysical analysis of the C-terminus of the CGRP-receptor; a family B GPCR. *Biochemistry* 47: 8434-8444.
3. Conner AC, Hay DL, Simms J, Howitt SG, Schindler M, et al. (2005) A key role for transmembrane prolines in calcitonin receptor-like receptor agonist binding and signalling: implications for family B G-protein-coupled receptors. *Mol Pharmacol* 67: 20-31.

4. Kuwasako K, Kitamura K, Nagata S, Hikosaka T, Kato J (2010) Function of the cytoplasmic tail of human calcitonin receptor-like receptor in complex with receptor activity-modifying protein 2. *Biochem Biophys Res Commun* 392: 380-385.
5. Barwell J, Conner A, Poyner DR (2011) Extracellular loops 1 and 3 and their associated transmembrane regions of the calcitonin receptor-like receptor are needed for CGRP receptor function. *Biochim Biophys Acta* 1813: 1906-1916.
6. Ittner LM, Luessi F, Koller D, Born W, Fischer JA, et al. (2004) Aspartate<sup>69</sup> of the calcitonin-like receptor is required for its functional expression together with receptor-activity-modifying proteins 1 and -2. *Biochem Biophys Res Commun* 319: 1203-1209.
