# Supplementary material for: Role in Diuresis of a Calcitonin Receptor (GPRCAL1) Expressed in a Distal-Proximal Gradient in Renal Organs of the Mosquito Aedes aegypti (L.)
Source: PubMed Central journal article supplement (PMC3510207; doi:10.1371/journal.pone.0050374), 2012-11-29
Supplement: pone.0050374.s005.pdf [file pone.0050374.s005.pdf]

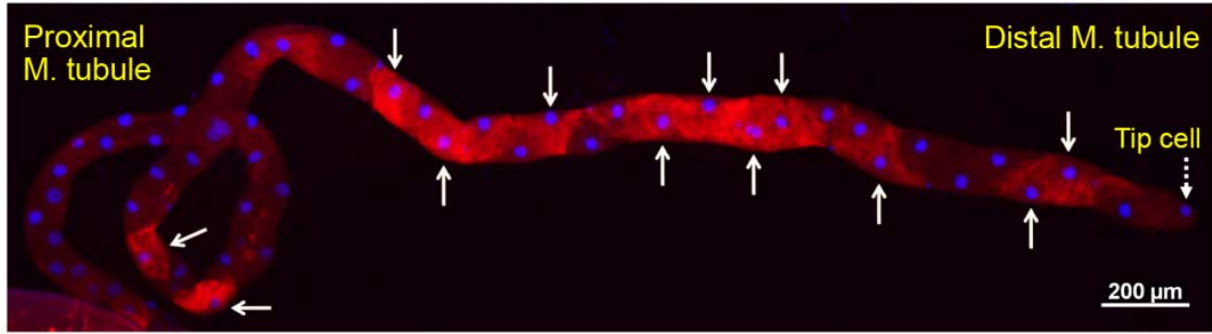

**Figure S5. Immunolocalization of *AaegGPRCAL1* along the length of a single MT.** The receptor signal (red, white arrows) was observed in only particular principal cells, the majority located towards the distal end which contains the tip cell.
