# Supplementary material for: Role in Diuresis of a Calcitonin Receptor (GPRCAL1) Expressed in a Distal-Proximal Gradient in Renal Organs of the Mosquito Aedes aegypti (L.)
Source: PubMed Central journal article supplement (PMC3510207; doi:10.1371/journal.pone.0050374), 2012-11-29
Supplement: pone.0050374.s006.pdf [file pone.0050374.s006.pdf]

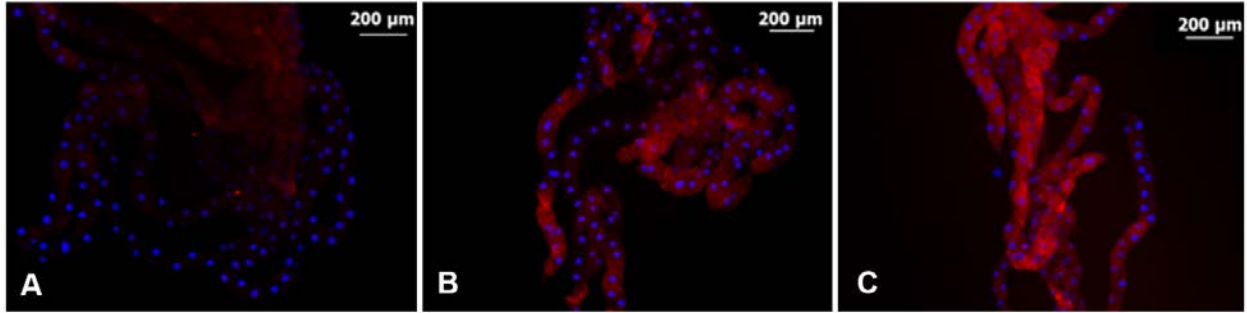

**Figure S6. Localization of *AaegGPRCAL1* in MTs from females injected with *AaegGPRcall* dsRNA, EGFP dsRNA and water.** (A) MTs from *AaegGPRcall* knock-down females exhibited reduction of receptor signal intensity (in this image by a factor of 2) compared to those of controls (B) EGFP dsRNA and (C) water.
