# Supplementary material for: Role in Diuresis of a Calcitonin Receptor (GPRCAL1) Expressed in a Distal-Proximal Gradient in Renal Organs of the Mosquito Aedes aegypti (L.)
Source: PubMed Central journal article supplement (PMC3510207; doi:10.1371/journal.pone.0050374), 2012-11-29
Supplement: pone.0050374.s007.pdf [file pone.0050374.s007.pdf]

**Table S1. Primers used for cloning, transcriptional and functional analyses (RNAi) of *AegGPRcall*.**

| Primers for PCR                      | Sequence (5'-3')                                                         | Orientation | cDNA location number /amino acid in Fig. S1 |
|--------------------------------------|--------------------------------------------------------------------------|-------------|---------------------------------------------|
| AADH31R7605                          | TTCCACCGGTCACAATAGTAAGACTAAGC : 29 bp                                    | Antisense   | 1715-1743/ 3'UTR                            |
| AADH31F29406                         | TGCCAGATATCAACCAAACACAAACCCAG : 31 bp                                    | Sense       | -88 to -58/5'UTR                            |
| AADH31F37609                         | ATGGTTGGCTCTGTTGGCCGGATACTGCG : 29 bp                                    | Sense       | 134-162/ DGWLCWPDTA                         |
| AADH31R37799                         | TTCTCCGTCCATCGCAGTCTTTGTGTGCG : 31 bp                                    | Antisense   | 225-225/FAHKDCDEGE                          |
| AADH31F65768                         | GCTCGATTACGCTACATATGAACCTGTTGCG : 33 bp                                  | Sense       | 433-465/ARITLHMNLFA                         |
| AADH31F68248                         | ATCGAGAACCATACTGCAAGCGTTCAGAGCC : 31 bp                                  | Sense       | 921-951/PSRTILQAFRA                         |
| AADH31R68434                         | GGGTCGGAACGGAGTCAATATGTACTGTAGGCC : 33 bp                                | Antisense   | 976-108/GLQYILTPFRP                         |
| <b>Primers for quantitative PCR</b>  |                                                                          |             |                                             |
| AADH31FQPCR3'ORF                     | TGGCGCACCGTGTCTT : 17 bp                                                 | Sense       | 1138-1154/WRTVFL                            |
| AADH31RQPCR3'ORF                     | GACACTTGCGTTGCGGTGTA : 20 bp                                             | Antisense   | 1175-1194/YTATQVS                           |
| P178 (β-actin)                       | GACTACCTGATGAAGATCCTGAC : 23 bp                                          | Sense       | <i>A. aegypti</i> actin ( (Aaeact-1)        |
| P179 (β-actin)                       | GCACAGCTTCTCCTTAATGTAC : 23 bp                                           | Antisense   | Accession number : U20287                   |
| <b>Primer for synthesis of dsRNA</b> |                                                                          |             |                                             |
| AADH31FT75'UTR                       | <u>TAATACGACTCACTATAGGGATTCTTTGCCAGATATC</u><br>AACCAAACACAAACCC : 53 bp | Sense       | -94 to -60/5'UTR                            |
| AADH31RT75'ORF                       | <u>TAATACGACTCACTATAGGGTCTCCGTCCATGCC</u><br>AGTCTTTGTGTGCG : 51 bp      | Antisense   | 270-300/FAHKDCDEGE                          |
| T7P164 (EGFP)                        | <u>TAATACGACTCACTATAGGGACGTAAACGGCCACAA</u><br>GTTACGCGTGTC : 48 bp      | Sense       |                                             |
| T7P165 (EGFP)                        | <u>TAATACGACTCACTATAGGGTCACGAATCCAGCAG</u><br>GACCATGTGATC : 48 bp       | Antisense   |                                             |

Numbers assigned for primers for PCR correspond to the first 5' nucleotide location in contigs AAGE02017873 or AAGE02019029
